# Supplementary material
Source: PubMed Central journal article supplement (PMC3186433)
Supplement: supp_M111.246108_jbc.M111.246108-1.pdf [file supp_M111.246108_jbc.M111.246108-1.pdf]

## Supplementary figure legends

Fig. S1: Sequence alignment of Dps-species occurring in the AAH-cluster. See also Fig. 1.

Fig. S2: Structure representation of the dodecameric AAH protein with one individual subunit color coded according to the sequence similarity shown in Fig. S1.

```

gi|70699881|gb|M TDTN I T T P A L T A D P E V A A A A A Q F L T P V V H K M Q A L V V N G K Q A H W N
gi|148272641|re|M I D T - V H V P T S S A S A D V A A G V A Q F L S P V V V N L Q A L A V N G K Q A H W H
gi|50954591|ref-- T D - I A A T Q S V S N P D V A A G V A Q F F A P V V I D L T A L V V N G K Q A H W H
gi|88855143|ref----- P Q T S A D P D V T S G V A Q F L G P V V T D L T A L S I D G K Q A H W H
gi|170781890|re|M I D T - V H V P T S S A S A D V A A G V A Q F L S P V V V N L Q A L A V N G K Q A H W H
gi|28493362|ref----- I M T T I L R E K N E T A L R V S Q F L G P I V V N L T A L S V D F K Q L H W H
gi|28572528|ref----- T T I L R E K N E T A L R V S Q F L S P I V V N L T A L S V D F K Q L H W H

```

```

cons . . . . . : : * : * : * : * : * : * : * : * :

```

```

gi|70699881|gb|V R G S N F I A I H E L L D S V V A H A Q D Y A D T A A E R I V A L G L P I D S R V S T M
gi|148272641|re|V R G A N F I G V H E F L D V L V A H A Q D W A D T A A E R V V A L G L P I D A R I E T V
gi|50954591|ref|V R G A N F I G V H E L L D V I V A H A Q E W A D L A A E R I V A L G L P V D A R L A T V
gi|88855143|ref|V R G A N F Q A V H E L L D V I V D H A R D W A D T A A E R V V A L G L P I D A R T Q T V
gi|170781890|re|V R G A N F I G V H E F L D V L V S H A Q G W A D T A A E R V V A L G L P I D A R I E T V
gi|28493362|ref|V R G G N F I A L H R L L D E I I D H A R E A A D V L A E R A V S V G V P V D G R I A S V
gi|28572528|ref|V R G G N F I G L H R L L D E I I D H A R E A A D V L A E R A V S V G V P V D G R I A S V

```

```

cons * * * . * * . : * . : * * : * * : * * * * : * : * : * : * . * :

```

```

gi|70699881|gb|A E K T S T A - V P A G F A Q W Q D E I K A I V S D I D A A L V D L Q A A I D G L D E V D
gi|148272641|re|A A S T T T A P L T P G F R P S S A T I A E V I A Q I D A T M E L V N R A V Q E L G E I D
gi|50954591|ref|A A K T S T G E L T A G F R P S N D A I A E V I A Q I D A A L A S V N A A V K E L D Q L D
gi|88855143|ref|A A K A T T P S M T A G F Q Q S D D V I A E V I A A I D A T L V T V R T A V D E L G E L D
gi|170781890|re|A A S T T T A A L T P G F R P S S A T I A E V I A Q I D A T M E L V N R A V Q E L G E I D
gi|28493362|ref|A A E T S T P A V P E G F I N S E Q A V D I A V A Q L D A V L L V I G E A I E N P S L L D
gi|28572528|ref|A A E T S T P A V P E G F I N S E Q A V D I A V A Q L D A V L L V I G E A I E N P S L L D

```

```

cons * . : : * . : . * * . : : : * * . : : : * : . . : : *

```

```

gi|70699881|gb|L T S Q D V A I E I K R G V D K D R W F L L A H L A E
gi|148272641|re|V N S Q D V A I E I A R G L E K D R W F L F A H I S E
gi|50954591|ref|Q T S Q D V A I E I A R G L D K D R W F L F A H I S E
gi|88855143|ref|K V S E D V A I E I A R G L E K D R W F L F A H L A -
gi|170781890|re|V N S Q D V A I E I A R G L E K D R W F L F A H I S E
gi|28493362|ref|A A S Q D A V I E V A R T L D K D R W F L L A H - - -
gi|28572528|ref|A A S Q D A V I E V A R T L D K D R W F L L A H - - -

```

Fig. S1

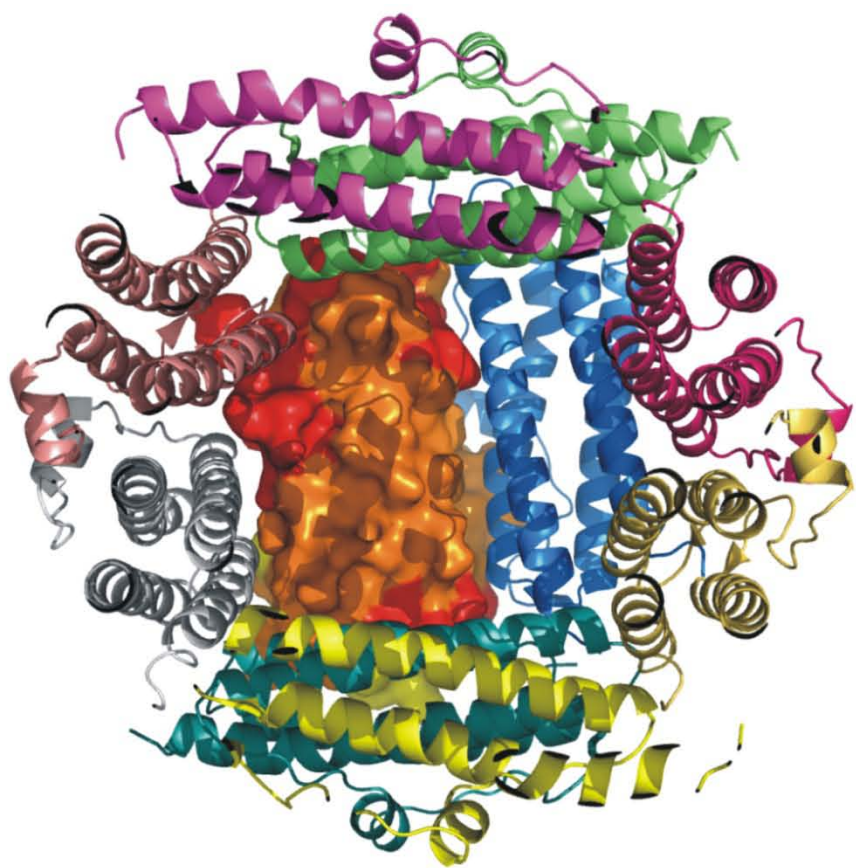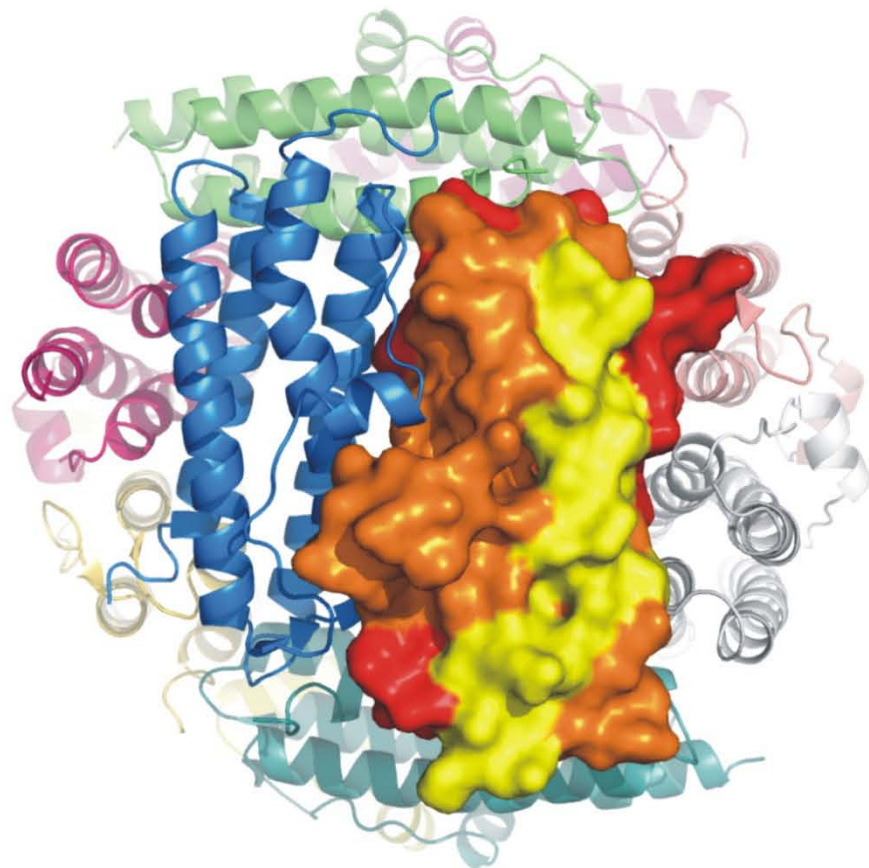

**Fig. S2**
